# Supplementary material for: Chromosome-Level Assembly of Flowering Cherry (Prunus campanulata) Provides Insight into Anthocyanin Accumulation
Source: MDPI journal article supplement (doi:10.3390/genes14020389), 2023-02-02
Supplement: s1 [file s1]

Table S1. Summary of sequencing data of *P. campanulata*.

| Method                | Sequencing platform | Library size | Total data (Gb) | Reads number | Sequence coverage (X) |
|-----------------------|---------------------|--------------|-----------------|--------------|-----------------------|
| Pair-end sequencing   | Illumina HiSeqXTen  | 350 bp       | 53.47           | 105,323,237  | 163.07                |
| PacBio SMRT           | Pacbio Sequel       | 20 Kb        | 42.73           | 5,198,616    | 130.32                |
| 10X Genomics Chromium | Illumina HiSeqXTen  | 350 bp       | 39.08           | 130,279,189  | 119.19                |
| Hi-C                  | Illumina HiSeqXTen  | 350 bp       | 42.20           | 118,522,234  | 129.05                |

Table S2. Summary of Hi-C assembly.

|                     | Input assembly         | LACHESIS assembly     |
|---------------------|------------------------|-----------------------|
| Total Length        | 300.48 Mb              | 300.08 Mb             |
| L50/N50             | 26 Scaffolds; 3.29 Mb  | 4 Scaffolds; 32.53 Mb |
| L90/N90             | 102 Scaffolds; 0.68 Mb | 8 Scaffolds; 26.95 Mb |
| Longest Scaffolds   | 12.08 Mb               | 51.49 Mb              |
| Number of Scaffolds | 492                    | 329                   |

Table S3. Chromosome clusters using Hi-C sequencing data.

| Group | Number of scaffolds | Length (bp) |
|-------|---------------------|-------------|
| Pca1  | 38                  | 51,585,711  |
| Pca2  | 74                  | 39,022,630  |
| Pca3  | 60                  | 37,392,320  |
| Pca4  | 58                  | 33,163,670  |
| Pca5  | 69                  | 32,973,666  |
| Pca6  | 50                  | 31,784,716  |
| Pca7  | 35                  | 30,424,867  |
| Pca8  | 44                  | 27,274,175  |
| Total | 428                 | 283,621,755 |

Table S4. Quality assessment of the assembled genome of *P. campanulata* using BUSCO and CEGMA.

| Type                             | BUSCO    |                | CEGMA    |                |
|----------------------------------|----------|----------------|----------|----------------|
|                                  | Proteins | Percentage (%) | Proteins | Percentage (%) |
| Complete (BUSCO and CEGMA)       | 1,390    | 96.5           | 235      | 94.8           |
| Complete and single-copy (BUSCO) | 1,289    | 89.5           |          |                |

|                                 |     |     |     |      |
|---------------------------------|-----|-----|-----|------|
| Complete and duplicated (BUSCO) | 101 | 7.0 |     |      |
| Fragmented (BUSCO)              | 16  | 1.1 |     |      |
| Complete and partial (CEGMA)    |     |     | 240 | 96.8 |
| Missing (BUSCO)                 | 34  | 2.4 |     |      |

Table S5. Summary of function annotation of protein-coding genes in *P. campanulata* using different databases.

| Database   |      | Annotated Number | Annotated Percentage (%) |
|------------|------|------------------|--------------------------|
| NR         |      | 26,322           | 93.00                    |
| Swiss-Prot |      | 20,711           | 73.20                    |
| KEGG       |      | 20,006           | 70.70                    |
|            | All  | 20,587           | 72.80                    |
| InterPro   | Pfam | 19,260           | 68.10                    |
|            | GO   | 14,215           | 50.20                    |
| Annotated  |      | 26,352           | 93.10                    |
| Total      |      | 28,291           | -                        |

Table S6. Summary of non-coding RNAs annotation in *P. campanulata*.

| Type  |          | Copy(w*) | Average length(bp) | Total length(bp) | Percentage of genome (%) |
|-------|----------|----------|--------------------|------------------|--------------------------|
| miRNA |          | 562      | 136.49             | 76,710           | 2.6                      |
| tRNA  |          | 721      | 74.89              | 53,994           | 1.8                      |
| rRNA  | rRNA     | 330      | 319.58             | 105,463          | 3.5                      |
|       | 18S      | 61       | 1132.93            | 69,109           | 2.3                      |
|       | 28S      | 152      | 140.05             | 21,288           | 0.7                      |
|       | 5.8S     | 42       | 146.07             | 6,135            | 0.2                      |
|       | 5S       | 75       | 119.08             | 8,931            | 0.3                      |
| snRNA | snRNA    | 617      | 111.42             | 68,856           | 2.3                      |
|       | CD-box   | 428      | 102.89             | 44,039           | 1.5                      |
|       | HACA-box | 40       | 121.62             | 4,865            | 0.2                      |
|       | splicing | 149      | 133.04             | 19,823           | 0.7                      |

Table S7. The numbers of orthologs among 11 species.

| Species | Single-copy orthologs | Multiple-copy orthologs | Unique | Other orthologs |
|---------|-----------------------|-------------------------|--------|-----------------|
|---------|-----------------------|-------------------------|--------|-----------------|

|                             |      |       |      |       |
|-----------------------------|------|-------|------|-------|
| <i>P. campanulata</i>       | 5658 | 6240  | 500  | 10121 |
| <i>P. persica</i>           | 5908 | 6297  | 1523 | 10859 |
| <i>P. mume</i>              | 5966 | 5935  | 117  | 9496  |
| <i>P. avium</i>             | 6071 | 5404  | 5819 | 13715 |
| <i>Pyrus bretschneideri</i> | 3129 | 15496 | 747  | 12035 |
| <i>Malus domestica</i>      | 2581 | 16372 | 1110 | 12818 |
| <i>Fragaria vesca</i>       | 6032 | 5622  | 1659 | 9359  |
| <i>Potentilla micrantha</i> | 6104 | 5197  | 2872 | 10420 |
| <i>Rosa chinensis</i>       | 5780 | 7302  | 1300 | 12630 |
| <i>Rubus occidentalis</i>   | 6009 | 5584  | 3650 | 9632  |
| <i>Arabidopsis thaliana</i> | 5019 | 8285  | 3230 | 6408  |

Table S8. The numbers of collinear gene pairs in the chromosomes of *P. campanulata*, *P. avium*, and *P. persica*.

| Chromosome | <i>P. campanulata</i> vs <i>P. avium</i> |                 | <i>P. campanulata</i> vs <i>P. persica</i> |                   |
|------------|------------------------------------------|-----------------|--------------------------------------------|-------------------|
|            | <i>P. campanulata</i>                    | <i>P. avium</i> | <i>P. campanulata</i>                      | <i>P. persica</i> |
| Chr1       | 3538                                     | 3388            | 4118                                       | 4046              |
| Chr2       | 1731                                     | 1752            | 2152                                       | 1970              |
| Chr3       | 1984                                     | 1662            | 2551                                       | 1944              |
| Chr4       | 1751                                     | 1707            | 2137                                       | 1977              |
| Chr5       | 1605                                     | 1439            | 1938                                       | 1761              |
| Chr6       | 1597                                     | 1924            | 1890                                       | 2443              |
| Chr7       | 1476                                     | 1575            | 1812                                       | 1921              |
| Chr8       | 1557                                     | 1452            | 1785                                       | 1752              |
| Scaffolds  | 90                                       | 115             | 163                                        | 186               |

Table S9. Syntenic regions between *P. campanulata* and *C. campanulata* haplotype of *P. × kanzakura* “Kawazu-zakura”.

Table S10. Syntenic regions between *P. campanulata* and *C. spachiana* haplotype of *P. × kanzakura* “Kawazu-zakura”.

Table S11. Significantly enriched GO terms for family genes under positive selection.

| GO term                                      | GO class | Adjusted <i>P</i> -value | Gene number |
|----------------------------------------------|----------|--------------------------|-------------|
| nucleic acid metabolic process               | BP       | 0.020770848              | 75          |
| cellular aromatic compound metabolic process | BP       | 0.023149632              | 88          |

|                                                  |    |             |    |
|--------------------------------------------------|----|-------------|----|
| heterocycle metabolic process                    | BP | 0.023149632 | 88 |
| organic cyclic compound metabolic process        | BP | 0.023149632 | 89 |
| nucleobase-containing compound metabolic process | BP | 0.023149632 | 83 |
| phagocytosis                                     | BP | 0.023149632 | 3  |
| cellular nitrogen compound metabolic process     | BP | 0.023149632 | 88 |
| bile acid:sodium symporter activity              | MF | 0.0288106   | 3  |
| ncRNA processing                                 | BP | 0.03893984  | 9  |
| RNA processing                                   | BP | 0.0456541   | 16 |
| RNA metabolic process                            | BP | 0.049872408 | 59 |

Table S12. Significantly enriched GO terms for family genes under expansion and contraction.

| GO term                                                     | GO class | Adjusted <i>P</i> -value | Gene number | Type        |
|-------------------------------------------------------------|----------|--------------------------|-------------|-------------|
| phosphoglycerate kinase activity                            | MF       | 2.99E-07                 | 4           | Expansion   |
| terpene synthase activity                                   | MF       | 2.39E-05                 | 4           | Expansion   |
| translation release factor activity, codon specific         | MF       | 2.39E-05                 | 4           | Expansion   |
| sequence-specific DNA binding                               | MF       | 3.39E-05                 | 11          | Expansion   |
| translational termination                                   | BP       | 4.31E-05                 | 4           | Expansion   |
| generation of precursor metabolites and energy              | BP       | 0.000213184              | 6           | Expansion   |
| sequence-specific DNA binding transcription factor activity | MF       | 0.000779133              | 11          | Expansion   |
| glycolytic process                                          | BP       | 0.001980865              | 4           | Expansion   |
| oxidoreductase activity                                     | MF       | 0.003235302              | 6           | Expansion   |
| ATP synthesis coupled electron transport                    | BP       | 0.004563201              | 2           | Expansion   |
| adenyl ribonucleotide binding                               | MF       | 8.01E-86                 | 136         | Contraction |
| purine ribonucleoside binding                               | MF       | 7.01E-72                 | 136         | Contraction |
| nucleotide binding                                          | MF       | 1.33E-64                 | 140         | Contraction |
| anion binding                                               | MF       | 2.59E-63                 | 140         | Contraction |
| ADP binding                                                 | MF       | 3.23E-46                 | 43          | Contraction |
| protein tyrosine kinase activity                            | MF       | 4.72E-45                 | 63          | Contraction |
| protein phosphorylation                                     | BP       | 4.92E-43                 | 67          | Contraction |
| protein kinase activity                                     | MF       | 2.56E-42                 | 67          | Contraction |
| ion binding                                                 | MF       | 1.26E-36                 | 166         | Contraction |

|                  |    |          |    |             |
|------------------|----|----------|----|-------------|
| defense response | BP | 1.18E-35 | 41 | Contraction |
|------------------|----|----------|----|-------------|

Table S13. Significantly enriched KEGG terms for family genes under expansion and contraction.

| Map title                                              | Adjusted <i>P</i> -value | Gene number | Type        |
|--------------------------------------------------------|--------------------------|-------------|-------------|
| Ribosome biogenesis in eukaryotes                      | 0.005609269              | 6           | Expansion   |
| Diterpenoid biosynthesis                               | 0.006402294              | 4           | Expansion   |
| Flavonoid biosynthesis                                 | 0.008391851              | 5           | Expansion   |
| ABC transporters                                       | 0.023259336              | 4           | Expansion   |
| Circadian rhythm - plant                               | 0.026329428              | 4           | Expansion   |
| Carbon fixation in photosynthetic organisms            | 0.029486305              | 4           | Expansion   |
| Ribosome                                               | 0.046266724              | 7           | Expansion   |
| Cyanoamino acid metabolism                             | 2.61E-30                 | 38          | Contraction |
| Phenylpropanoid biosynthesis                           | 1.02E-12                 | 25          | Contraction |
| ABC transporters                                       | 4.45E-12                 | 21          | Contraction |
| Plant-pathogen interaction                             | 1.38E-11                 | 35          | Contraction |
| Tropane, piperidine and pyridine alkaloid biosynthesis | 2.76E-06                 | 10          | Contraction |
| Isoquinoline alkaloid biosynthesis                     | 1.71E-05                 | 10          | Contraction |
| Phenylalanine metabolism                               | 3.83E-05                 | 10          | Contraction |
| beta-Alanine metabolism                                | 7.56E-05                 | 10          | Contraction |
| Stilbenoid, diarylheptanoid and gingerol biosynthesis  | 7.56E-05                 | 11          | Contraction |
| Tyrosine metabolism                                    | 0.00023254               | 10          | Contraction |
| Glycine, serine and threonine metabolism               | 0.001362489              | 10          | Contraction |

Table S14. The gene ID of MYB genes identified in the genome of *P. campanulata*.

Table S15. The FPKM values of the *PcMYB* genes in the various tissues of *P. campanulata*.

Table S16. Summary of TE contents in *P. campanulata*, *P. avium* “Tieton”, *P. avium* “Satonishiki”, *C. serrulata*, and *P. fruticosa*.
